# Supplementary material for: Antennal Transcriptome Analysis of the Chemosensory Gene Families From Trichoptera and Basal Lepidoptera
Source: Front Physiol. 2018 Sep 27;9:1365. doi: 10.3389/fphys.2018.01365 (PMC6171000; doi:10.3389/fphys.2018.01365)
Supplement: DATA SHEET S4 — Accession numbers and/or source references for the protein sequences included in the trees presented in Figures 2–6. [file Data_Sheet_4.xlsx]

## Sheet: ORs
Protein name	Reference	Accession number
EposORs	Corcoran et al., 2015	-
EsemOrco	Yuvaraj et al., 2017	KY750554
EsemOR1	Yuvaraj et al., 2017	KY750555
EsemOR3	Yuvaraj et al., 2017	KY750556
EsemOR4	Yuvaraj et al., 2017	KY750557
EsemOR5	Yuvaraj et al., 2017	KY750558
EsemOR6	Yuvaraj et al., 2017	KY750559
EsemOR7-37	Yuvaraj et al., 2017	-
LcapOrco	Yuvaraj et al., 2018	MG913127
LcapOR1	Yuvaraj et al., 2018	MG913128
LcapOR3	Yuvaraj et al., 2018	MG913129
LcapOR4	Yuvaraj et al., 2018	MG913130
LcapOR5	Yuvaraj et al., 2018	MG913131
LcapOR6	Yuvaraj et al., 2018	MG913132
LcapOR7	Yuvaraj et al., 2018	MG913133
LcapOR8	Yuvaraj et al., 2018	MG913134
LcapOR9-53	Yuvaraj et al., 2018	-
MsexORs	Koenig et al., 2015	-
PxylORs	Engsontia et al., 2014	-
RnubOR1	This study	MH723588
RnubOR2	This study	MH723589
RnubOR3	This study	MH723590
RnubOR4	This study	MH723591
RnubOR5	This study	MH723592
RnubOR6	This study	MH723593
RnubOR7	This study	MH723594
RnubOR8	This study	MH723595
RnubOR9	This study	MH723596
RnubOR10	This study	MH723597
RnubOR11	This study	MH723598
RnubOR12-37	This study	-
Cited literature
Corcoran, J.A., Jordan, M.D., Thrimawithana, A.H., Crowhurst, R.N., and Newcomb, R.D. (2015). The peripheral olfactory repertoire of the lightbrown apple moth, Epiphyas postvittana. PloS one 10, e0128596.
Engsontia, P., Sangket, U., Chotigeat, W., and Satasook, C. (2014). Molecular evolution of the odorant and gustatory receptor genes in lepidopteran insects: implications for their adaptation and speciation. J. Mol. Evol. 79, 21-39.
Koenig, C., Hirsh, A., Bucks, S., Klinner, C., Vogel, H., Shukla, A., et al. (2015). A reference gene set for chemosensory receptor genes of Manduca sexta. Insect Biochem. Mol. Biol. 66, 51-63.
Yuvaraj, J.K., Corcoran, J.A., Andersson, M.N., Newcomb, R.D., Anderbrant, O., and Löfstedt, C. (2017). Characterization of odorant receptors from a non-ditrysian moth, Eriocrania semipurpurella sheds light on the origin of sex pheromone receptors in Lepidoptera. Mol. Biol. Evol. 34, 2733-2746.
Yuvaraj, J.K., Andersson, M.N., Corcoran, J.A., Anderbrant, O., and Löfstedt, C. (2018). Functional characterization of odorant receptors from Lampronia capitella suggests a non-ditrysian origin of the lepidopteran pheromone receptor clade. Insect Biochem. Mol. Biol. 100, 39-47.

## Sheet: IRs
Protein name	Reference	Accession number
DmelIR8a	-	AAF46470
DmelIR21a	-	AAF51569
DmelIR25a	-	NP_001260049
DmelIR31a	-	AAN10751
DmelIR40a	-	AAF57255
DmelIR41a	-	AAS64776
DmelIR60a	-	AAF47186
DmelIR64a	-	AAF50781
DmelIR68a	-	AAF50075
DmelIR75a	-	AAF49300
DmelIR75b	-	ACL83321
DmelIR75c	-	AAF49299
DmelIR75d	-	AAF49210
DmelIR76a	-	ABW08571
DmelIR76b	-	AAF49071
DmelIR84a	-	AAF54020
DmelIR87a	-	AAF54949
DmelIR92a	-	AAF55757
DmelIR93a	-	AAF55817
EposIRs	Corcoran et al., 2015	-
EsemIRs	This study	-
LcapIRs	This study	-
MsexIRs	Koenig et al., 2015	-
PxylIRs	Liu et al., 2018	-
RnubIRs	This study	-
Cited literature
Corcoran, J.A., Jordan, M.D., Thrimawithana, A.H., Crowhurst, R.N., and Newcomb, R.D. (2015). The peripheral olfactory repertoire of the lightbrown apple moth, Epiphyas postvittana. PloS one 10, e0128596.
Koenig, C., Hirsh, A., Bucks, S., Klinner, C., Vogel, H., Shukla, A., et al. (2015). A reference gene set for chemosensory receptor genes of Manduca sexta. Insect Biochem. Mol. Biol. 66, 51-63.
Liu, N.-Y., Xu, W., Dong, S.-L., Zhu, J.-Y., Xu, Y.-X., and Anderson, A. (2018). Genome-wide analysis of ionotropic receptor gene repertoire in Lepidoptera with an emphasis on its functions of Helicoverpa armigera. Insect Biochem. Mol. Biol. 99, 37-53.

## Sheet: OBPs
Protein name	Reference	Accession number
EposOBPs	Corcoran et al., 2015	-
EsemOBPs	This study	-
LcapOBPs	This study	-
MsexOBPs	Vogt et al., 2015	-
PxylGOBP1	-	ABY71034.1
PxylGOBP2	-	ABY71035.2
PxylOBP3	Zhu et al., 2016	ANC60174.1
PxylOBP6	-	ANG08530.1
PxylOBP9	Zhu et al., 2016	ANC60175.1
PxylOBP12	-	ANG08531.1
PxylOBP13	-	ANG08532.1
PxylOBP18	-	AMR99730.1
PxylOBP19	Zhu et al., 2016	ANC60176.1
PxylOBP23	-	ANG08533.1
PxylOBP24	-	AMR99731.1
PxylOBP28	-	AMR99728.1
PxylOBP31	-	ANG08529.1
PxylOBP32	-	ANG08535.1
PxylOBP34	-	ANG08534.1
PxylPBP1	Zhang et al., 2009	ACI28451.1
PxylPBP2	Sun et al., 2013	AGH13203.1
RnubOBPs	This study	-
Cited literature
Corcoran, J.A., Jordan, M.D., Thrimawithana, A.H., Crowhurst, R.N., and Newcomb, R.D. (2015). The peripheral olfactory repertoire of the lightbrown apple moth, Epiphyas postvittana. PloS one 10, e0128596.
Sun, M., Liu, Y., and Wang, G. (2013). Expression patterns and binding properties of three pheromone binding proteins in the diamondback moth, Plutella xyllotella. J. Insect Physiol. 59, 46-55.
Vogt, R.G., Große-Wilde, E., and Zhou, J.-J. (2015). The Lepidoptera Odorant Binding Protein gene family: Gene gain and loss within the GOBP/PBP complex of moths and butterflies. Insect Biochem. Mol. Biol. 62, 142-153.
Zhang, Z.C., Wang, M.Q., and Zhang, G. (2009). Molecular cloning and expression of pheromone‐binding protein1 from the diamondback moth, Plutella xylostella. Entomol. Exp. Appl. 133, 136-145.
Zhu, J., Pelosi, P., Liu, Y., Lin, K.-J., Yuan, H.-B., and Wang, G.-R. (2016). Ligand-binding properties of three odorant-binding proteins of the diamondback moth Plutella xylostella. J. Integr. Agric. 15, 580-590.

## Sheet: CSPs
Protein name	Reference	Accession number
EposCSP1-13	Corcoran et al., 2015	-
EsemCSP1-14	This study	-
LcapCSP1-17	This study	-
PxylCSP1	Liu et al., 2010	EF186791
PxylCSP2	Liu et al., 2010	EF196792
PxylCSP3	Liu et al., 2010	EF202828
PxylCSP4	Liu et al., 2010	EF202829
PxylCSP5-15	Liu et al., 2010	-
RnubCSP1-7	This study	-
Cited literature
Corcoran, J.A., Jordan, M.D., Thrimawithana, A.H., Crowhurst, R.N., and Newcomb, R.D. (2015). The peripheral olfactory repertoire of the lightbrown apple moth, Epiphyas postvittana. PloS one 10, e0128596.
Liu, X., Luo, Q., Zhong, G., Rizwan-Ul-Haq, M., and Hu, M. (2010). Molecular characterization and expression pattern of four chemosensory proteins from diamondback moth, Plutella xylostella (Lepidoptera: Plutellidae). J. Biochem. 148, 189-200.

## Sheet: SNMPs
Protein name	Reference	Accession number
DmelCrq-A	Adams et al., 2000	AAM70803.2
EposSNMP1	Corcoran et al., 2015	-
EposSNMP2	Corcoran et al., 2015	-
EsemSNMP1	This study	-
EsemSNMP1	This study	-
LcapSNMP1a	This study	-
LcapSNMP1b	This study	-
LcapSNMP2	This study	-
MsexSNMP1	Rogers et al., 2001	AAG49366.1
MsexSNMP2	Rogers et al., 2001	AAG49365.1
PxylSNMP1	Li and Qin, 2011	ADK66278.1
PxylSNMP2	-	XP_011550026.1
RnubSNMP1	This study	-
RnubSNMP2	This study	-
Cited literature
Adams, M.D., Celniker, S.E., Holt, R.A., Evans, C.A., Gocayne, J.D., Amanatides, P.G., et al. (2000). The genome sequence of Drosophila melanogaster. Science 287, 2185-2195.
Corcoran, J.A., Jordan, M.D., Thrimawithana, A.H., Crowhurst, R.N., and Newcomb, R.D. (2015). The peripheral olfactory repertoire of the lightbrown apple moth, Epiphyas postvittana. PloS one 10, e0128596.
Li, P.-Y., and Qin, Y.-C. (2011). Molecular cloning and characterization of sensory neuron membrane protein and expression pattern analysis in the diamondback moth, Plutella xylostella (Lepidoptera: Plutellidae). Appl. Entomol. Zool. 46, 497.
Rogers, M.E., Krieger, J., and Vogt, R.G. (2001). Antennal SNMPs (sensory neuron membrane proteins) of lepidoptera define a unique family of invertebrate CD36‐like proteins. J. Neurobiol. 49, 47-61.
